# Supplementary material for: Interpretable adenylation domain specificity prediction using protein language models
Source: PubMed Central journal article supplement (PMC11761653; doi:10.1101/2025.01.13.632878), 2025-01-18
Supplement: NIHPP2025.01.13.632878v1-supplement-1.pdf [file NIHPP2025.01.13.632878v1-supplement-1.pdf]

| Name            | BGC        | Seq2Hybrid Tanimoto | Prism 4 Tanimoto |
|-----------------|------------|---------------------|------------------|
| Rakicidin B     | BGC0001327 | 1                   | 0.211            |
| Micromonolactam | NA         | 1                   | 0.747            |
| Hapalosin       | BGC0001467 | 1                   | 0.744            |
| JBIR-06         | BGC0001918 | 1                   | 0.693            |
| Neoantimycin    | BGC0001695 | 1                   | 0.678            |
| Cystothiazole A | BGC0000982 | 1                   | 0.614            |
| Kasumigamide    | BGC0001630 | 1                   | 0.472            |
| Incednine       | BGC0000078 | 1                   | 0.306            |
| Pyridomycin     | BGC0001039 | 1                   | 0.384            |
| Rufomycin       | BGC0001763 | 1                   | 0.27             |
| Ilamycins       | BGC0001620 | 1                   | 0.27             |
| Splenocin C     | BGC0001216 | 1                   | 0.532            |
| Eponemycin      | BGC0000345 | 1                   | 0.185            |
| Nostopeptolide  | BGC0001028 | 0.924               | 0.752            |
| Skyllamycin     | BGC0000429 | 0.852               | 0.56             |
| Leucinostatin A | BGC0001358 | 0.802               | 0.12             |
| Paenilipoheptin | BGC0001728 | 0.796               | 0.463            |
| Althiomycin     | BGC0000955 | 0.791               | 0.252            |
| Tubulylin       | BGC0001344 | 0.762               | 0.364            |
| Cryptomaldamide | BGC0001560 | 0.758               | 0.393            |
| Bacillomycin D  | BGC0001090 | 0.757               | 0.238            |
| Salinilactam    | BGC0000142 | 0.753               | 0.51             |
| Lobosamide      | BGC0001303 | 0.747               | 0.505            |
| Myxochromide A  | BGC0001425 | 0.739               | 0.41             |
| Myxochromide C  | BGC0001423 | 0.736               | 0.48             |

**Supplementary Table S1.** Seq2Hybrid vs PRISM 4 performance at recovering NRP-PK hybrid molecules at or above a Tanimoto similarity threshold of 0.7 in either the training or test set.

| Strains                                         |
|-------------------------------------------------|
| <i>Streptomyces atratus</i> NBRC 3897           |
| <i>Streptomyces pyridomyceticus</i> NRRL B-2517 |
| <i>Streptomyces orinoci</i> NBRC 13466          |
| <i>Micromonospora chalcea</i> NRRL B-2672       |
| <i>Streptomyces alboflavus</i> strain MDJK44    |
| <i>Streptomyces hygrosopicus</i> NRRL B-1477    |
| <i>Streptomyces kasugaensis</i> NBRC 13851      |
| <i>Streptomyces violascens</i> NRRL B-2700      |

**Supplementary Table S2.** Strains used in this study for which mass spectrometry data was obtained.

| Substrate | SMILES                                        |
|-----------|-----------------------------------------------|
| Arg       | <chem>C(CC(C(=O)O)N)CN=C(N)N</chem>           |
| His       | <chem>C1=C(NC=N1)CC(C(=O)O)N</chem>           |
| Lys       | <chem>C(CCN)CC(C(=O)O)N</chem>                |
| Asp       | <chem>C(C(C(=O)O)N)C(=O)O</chem>              |
| Glu       | <chem>C(CC(=O)O)C(C(=O)O)N</chem>             |
| Ser       | <chem>C(C(C(=O)O)N)O</chem>                   |
| Thr       | <chem>CC(C(C(=O)O)N)O</chem>                  |
| Asn       | <chem>C(C(C(=O)O)N)C(=O)N</chem>              |
| Gln       | <chem>C(CC(=O)N)C(C(=O)O)N</chem>             |
| Cys       | <chem>C(C(C(=O)O)N)S</chem>                   |
| Gly       | <chem>C(C(=O)O)N</chem>                       |
| Pro       | <chem>C1CC(NC1)C(=O)O</chem>                  |
| Ala       | <chem>CC(C(=O)O)N</chem>                      |
| Val       | <chem>CC(C)C(C(=O)O)N</chem>                  |
| Ile       | <chem>CCC(C)C(C(=O)O)N</chem>                 |
| Leu       | <chem>CC(C)CC(C(=O)O)N</chem>                 |
| Met       | <chem>CSCCC(C(=O)O)N</chem>                   |
| Phe       | <chem>C1=CC=C(C=C1)CC(C(=O)O)N</chem>         |
| Tyr       | <chem>C1=CC(=CC=C1CC(C(=O)O)N)O</chem>        |
| Trp       | <chem>C1=CC=C2C(=C1)C(=CN2)CC(C(=O)O)N</chem> |
| Orn       | <chem>C(CC(C(=O)O)N)CN</chem>                 |
| 5hfOrn    | <chem>C(CC(C(=O)O)N)CN(C=O)O</chem>           |
| 5hOrn     | <chem>C(CC(C(=O)O)N)CNO</chem>                |
| 4-MePro   | <chem>CC1CC(NC1)C(=O)O</chem>                 |
| Bht       | <chem>C1=CC(=CC=C1C(C(=O)O)N)O)O</chem>       |
| Hty       | <chem>C1=CC(=CC=C1CCC(C(=O)O)N)O</chem>       |
| MeDap     | <chem>CC(C(C(=O)O)N)N</chem>                  |
| MeAsp     | <chem>CC(C(C(=O)O)N)C(=O)O</chem>             |
| HyAsp     | <chem>OC(C(C(=O)O)N)C(=O)O</chem>             |
| CAM       | <chem>OC(=O)C(N)C1CCNC(=N)N1</chem>           |
| hEnd      | <chem>C1C(NC(N1)=N)C(C(C(=O)O)N)O</chem>      |
| Dab       | <chem>OC(=O)C(N)CCN</chem>                    |
| 1-2,3-DAP | <chem>OC(=O)C(N)CN</chem>                     |
| Aad       | <chem>C(CC(C(=O)O)N)CC(=O)O</chem>            |
| Dhpg      | <chem>C1=C(C=C(C=C1O)O)C(C(=O)O)N</chem>      |
| Hpg       | <chem>C1=CC(=CC=C1C(C(=O)O)N)O</chem>         |
| Dhb       | <chem>C1=CC(=C(C(=C1)O)O)C(=O)O</chem>        |
| Beta-ala  | <chem>C(CN)C(=O)O</chem>                      |
| Hyv-d     | <chem>CC(CO)C(C(=O)O)N</chem>                 |
| Pip       | <chem>C1CCNC(C1)C(=O)O</chem>                 |
| Dht       | <chem>CC(=C(C(=O)O)N)O</chem>                 |

**Supplementary Table S3.** Substrates used in this study to train MASPR and their corresponding SMILES representations.
